# Supplementary material for: Evaluation of non-invasive imaging parameters in coronary microvascular disease: a systematic review
Source: PubMed Central journal article supplement (PMC7789672; doi:10.1186/s12880-020-00535-7), 2021-01-06
Supplement: 12880_2020_535_MOESM2_ESM.pdf [file 12880_2020_535_MOESM2_ESM.pdf]

**Additional file 2: Table S1 Risk of bias assessment according to QUADAS-2.**

| Author (year)      | Risk of bias             |                   |                           |                        |                                          | Applicability concerns   |                   |                           |                                          |
|--------------------|--------------------------|-------------------|---------------------------|------------------------|------------------------------------------|--------------------------|-------------------|---------------------------|------------------------------------------|
|                    | <i>Patient selection</i> | <i>Index test</i> | <i>Reference standard</i> | <i>Flow and timing</i> | <i>Overall judgement of risk of bias</i> | <i>Patient selection</i> | <i>Index test</i> | <i>Reference standard</i> | <i>Overall concern for applicability</i> |
| Meeder (1997)      | Red                      | Yellow            | Yellow                    | Yellow                 | Red                                      | Green                    | Green             | Green                     | Green                                    |
| Bottcher (1999)    | Red                      | Yellow            | Green                     | Green                  | Red                                      | Green                    | Green             | Green                     | Green                                    |
| Buus (1999)        | Yellow                   | Yellow            | Green                     | Green                  | Yellow                                   | Green                    | Green             | Green                     | Green                                    |
| Panting (2002)     | Yellow                   | Green             | Green                     | Red                    | Red                                      | Green                    | Green             | Green                     | Green                                    |
| Marroquin (2003)   | Red                      | Yellow            | Yellow                    | Yellow                 | Red                                      | Green                    | Green             | Green                     | Green                                    |
| De Vries (2006)    | Green                    | Yellow            | Green                     | Yellow                 | Yellow                                   | Green                    | Green             | Green                     | Green                                    |
| Graf (2006)        | Yellow                   | Red               | Green                     | Green                  | Red                                      | Green                    | Green             | Green                     | Green                                    |
| Pärkkä (2006)      | Yellow                   | Yellow            | Yellow                    | Green                  | Yellow                                   | Green                    | Green             | Green                     | Green                                    |
| Wöhrle (2006)      | Yellow                   | Green             | Green                     | Green                  | Yellow                                   | Green                    | Green             | Green                     | Green                                    |
| Graf (2007)        | Green                    | Yellow            | Green                     | Yellow                 | Yellow                                   | Green                    | Green             | Green                     | Green                                    |
| Vermeltoort (2007) | Red                      | Green             | Green                     | Red                    | Red                                      | Green                    | Green             | Green                     | Green                                    |
| Galiuto (2007)     | Yellow                   | Yellow            | Green                     | Yellow                 | Yellow                                   | Green                    | Green             | Green                     | Green                                    |
| Cemin (2008)       | Yellow                   | Green             | Green                     | Yellow                 | Yellow                                   | Green                    | Green             | Green                     | Green                                    |
| Lanza (2008)       | Yellow                   | Yellow            | Green                     | Green                  | Yellow                                   | Green                    | Green             | Green                     | Green                                    |
| Di Monaco (2009)   | Yellow                   | Yellow            | Green                     | Yellow                 | Yellow                                   | Green                    | Green             | Green                     | Green                                    |
| Mehta (2011)       | Green                    | Yellow            | Green                     | Yellow                 | Yellow                                   | Green                    | Green             | Green                     | Green                                    |
| Scholtens (2011)   | Yellow                   | Yellow            | Green                     | Yellow                 | Yellow                                   | Green                    | Green             | Green                     | Green                                    |
| Sestito (2011)     | Green                    | Yellow            | Green                     | Yellow                 | Yellow                                   | Green                    | Green             | Green                     | Green                                    |
| Vaccarino (2011)   | Red                      | Green             | Yellow                    | Yellow                 | Red                                      | Green                    | Green             | Green                     | Green                                    |
| Vermeltoort (2011) | Yellow                   | Yellow            | Yellow                    | Yellow                 | Yellow                                   | Green                    | Green             | Green                     | Green                                    |
| Di Franco (2012)   | Green                    | Green             | Green                     | Yellow                 | Yellow                                   | Green                    | Green             | Green                     | Green                                    |
| Karamitsos (2012)  | Yellow                   | Yellow            | Green                     | Yellow                 | Yellow                                   | Green                    | Green             | Green                     | Green                                    |
| Uusitalo (2013)    | Yellow                   | Yellow            | Green                     | Yellow                 | Yellow                                   | Green                    | Green             | Green                     | Green                                    |
| Nelson (2014)      | Yellow                   | Yellow            | Green                     | Yellow                 | Yellow                                   | Green                    | Green             | Green                     | Green                                    |
| Thomson (2015)     | Yellow                   | Green             | Green                     | Yellow                 | Yellow                                   | Green                    | Green             | Green                     | Green                                    |
| Tagliamonte (2015) | Yellow                   | Yellow            | Green                     | Green                  | Yellow                                   | Green                    | Green             | Green                     | Green                                    |
| Wu (2015)          | Yellow                   | Yellow            | Yellow                    | Yellow                 | Yellow                                   | Green                    | Green             | Green                     | Green                                    |
| Bairey Merz (2016) | Yellow                   | Yellow            | Green                     | Yellow                 | Yellow                                   | Green                    | Green             | Green                     | Green                                    |
| Bakir (2016)       | Red                      | Yellow            | Yellow                    | Yellow                 | Red                                      | Green                    | Green             | Green                     | Green                                    |
| Mygind (2016)      | Green                    | Yellow            | Green                     | Red                    | Red                                      | Green                    | Green             | Green                     | Green                                    |
| Anchisi (2017)     | Red                      | Yellow            | Green                     | Yellow                 | Red                                      | Green                    | Green             | Green                     | Green                                    |

|                  |        |        |       |        |        |       |       |       |       |
|------------------|--------|--------|-------|--------|--------|-------|-------|-------|-------|
| Jaarsma (2017)   | Green  | Yellow | Green | Green  | Yellow | Green | Green | Green | Green |
| Michelsen (2017) | Green  | Green  | Green | Green  | Green  | Green | Green | Green | Green |
| Liu (2018) (19)  | Yellow | Green  | Green | Green  | Yellow | Green | Green | Green | Green |
| Liu (2018) (27)  | Yellow | Green  | Green | Green  | Yellow | Green | Green | Green | Green |
| Zorach (2018)    | Green  | Yellow | Green | Yellow | Yellow | Green | Green | Green | Green |
| Rahman (2019)    | Yellow | Yellow | Green | Yellow | Yellow | Green | Green | Green | Green |

**Legenda risk of bias assessment**

|                                                             |        |
|-------------------------------------------------------------|--------|
| Low risk of bias or<br>Low concern of applicability         | Green  |
| High risk of bias or<br>High concern of applicability       | Red    |
| Unclear risk of bias or<br>Unclear concern of applicability | Yellow |
