# Supplementary material for: Evaluation of non-invasive imaging parameters in coronary microvascular disease: a systematic review
Source: PubMed Central journal article supplement (PMC7789672; doi:10.1186/s12880-020-00535-7), 2021-01-06
Supplement: 12880_2020_535_MOESM3_ESM.pdf [file 12880_2020_535_MOESM3_ESM.pdf]

**Additional file 3: Table S2 Quantification of coronary microvascular dysfunction in CMR studies.**

| Study                           | Outcome measure         | CMR imaging protocol    | Patient group n = | Mean ( $\pm$ SD)                  | Control group n = | Mean ( $\pm$ SD)                  |
|---------------------------------|-------------------------|-------------------------|-------------------|-----------------------------------|-------------------|-----------------------------------|
| <b>Mean <math>\pm</math> SD</b> |                         |                         |                   |                                   |                   |                                   |
| Panting (2002)                  | MPRI                    | 1.5T, adenosine         | 20                | 1.47 $\pm$ 0.36                   | 10                | 1.50 $\pm$ 0.47                   |
| Wöhrle (2006)                   | MPRI                    | 1.5T, adenosine         | 12                | 1.48 $\pm$ 0.71                   | N/A               | N/A                               |
| Pärkkä (2006)                   | MPR                     | 1.5T, dipyridamole      | N/A               | N/A                               | 18                | 2.51 $\pm$ 0.95                   |
| Vermeltfoort (2007)             | MPRI                    | 1.5T, adenosine         | 20                | 1.83 $\pm$ 0.50                   | N/A               | N/A                               |
| Karamitsos (2012)               | CFR (corrected for RPP) | 3.0T, adenosine         | 18                | 2.63 $\pm$ 0.12                   | 14                | 2.53 $\pm$ 0.13                   |
| Nelson (2014)                   | MPRI                    | 1.5T, adenosine         | N/A               | N/A                               | 15                | 2.20 $\pm$ 0.53                   |
| Thomson (2015)                  | MPRI                    | 1.5T, adenosine         | 118               | 1.71 $\pm$ 0.43                   | 21                | 2.23 $\pm$ 0.37                   |
| Bairey Merz (2016)              | MPRI                    | 1.5T, adenosine         | 128               | 1.60 $\pm$ 0.30                   | N/A               | N/A                               |
| Bakir (2016)                    | MPRI                    | 1.5T, adenosine         | N/A               | N/A                               | 20                | 2.19 $\pm$ 0.38                   |
| Liu (2018) [15]                 | MPRI                    | 1.5T or 3.0T, adenosine | 22                | 1.60 $\pm$ 0.50                   | 20                | 2.00 $\pm$ 0.30                   |
| Liu (2018) [29]                 | MPRI (MPR)              | 1.5T, adenosine         | 13                | 1.30 $\pm$ 0.50 (1.50 $\pm$ 0.60) | 20                | 2.00 $\pm$ 0.30 (2.80 $\pm$ 0.50) |
|                                 |                         | 3.0T, adenosine         | 11                | 1.20 $\pm$ 0.20 (1.80 $\pm$ 0.70) | 10                | 2.00 $\pm$ 0.30 (2.80 $\pm$ 0.40) |
| Rahman (2019)                   | MPR                     | 3.0T, adenosine         | 38                | 2.01 $\pm$ 0.41                   | 27                | 2.68 $\pm$ 0.49                   |
| <b>Median (IQR)</b>             |                         |                         |                   |                                   |                   |                                   |
| Jaarsma (2017)                  | MPR                     | 3.0T, adenosine         | 12                | 1.35 (1.09-1.78)                  | N/A               | N/A                               |
| <b>Median (range)</b>           |                         |                         |                   |                                   |                   |                                   |
| Mehta (2011)                    | MPRI                    | 1.5T, adenosine         | 20                | 1.40 (1.20 – 1.90)                | N/A               | N/A                               |

|                  |     |                      |    |                    |    |                      |
|------------------|-----|----------------------|----|--------------------|----|----------------------|
| Zorach<br>(2018) | MPR | 1.5T,<br>regadenoson | 46 | 2.21 (1.95 – 2.69) | 20 | 2.93 (2.76-<br>3.19) |
|------------------|-----|----------------------|----|--------------------|----|----------------------|

**Abbreviations:** CFR = coronary flow reserve, IQR = interquartile range, MPR = myocardial perfusion reserve, MPRI = myocardial perfusion reserve index, N/A = not available, SD = standard deviation, T = Tesla.
