# Supplementary material for: Evaluation of non-invasive imaging parameters in coronary microvascular disease: a systematic review
Source: PubMed Central journal article supplement (PMC7789672; doi:10.1186/s12880-020-00535-7), 2021-01-06
Supplement: 12880_2020_535_MOESM4_ESM.pdf [file 12880_2020_535_MOESM4_ESM.pdf]

**Additional file 4: Table S3 Quantification of coronary microvascular dysfunction in PET studies. Correction for RPP is indicated by + or –.**

| Study                            | Outcome measure | PET imaging protocol                          | Patient group n = | Mean ( $\pm$ SD) | Control group n = | Mean ( $\pm$ SD) |
|----------------------------------|-----------------|-----------------------------------------------|-------------------|------------------|-------------------|------------------|
| <i>Mean <math>\pm</math> SD</i>  |                 |                                               |                   |                  |                   |                  |
| Meeder (1997)                    | MPR (-)         | N-13, dipyridamole                            | 25                | 2.71 $\pm$ 0.67  | 21                | 2.91 $\pm$ 1.04  |
| Bottcher (1999)                  | CFR (+)         | N-13, dipyridamole                            | 25                | 2.03 $\pm$ 0.53  | 15                | 2.96 $\pm$ 0.63  |
| Marroquin (2003)                 | CFR (-)         | N-13, adenosine                               | 34                | 2.85 $\pm$ 1.35  | N/A               | N/A              |
| Graf (2006)                      | CFR (+)         | N-13, dipyridamole                            | 58                | 2.14 $\pm$ 0.88  | N/A               | N/A              |
| De Vries (2006)                  | CFR (+)         | N-13, dipyridamole                            | 24                | 1.99 $\pm$ 0.70  | 21                | 2.91 $\pm$ 1.04  |
| Pärkkä (2006)                    | MPR (-)         | 15-O labeled water, dipyridamole              | N/A               | N/A              | 18                | 4.32 $\pm$ 1.78  |
| Graf (2007)                      | CFR (-)         | N-13, dipyridamole                            | 79                | 2.37 $\pm$ 1.00  | N/A               | N/A              |
| Scholtens (2011)                 | MPR (+)         | N-13, adenosine                               | 14                | 1.39 $\pm$ 0.31  | 13                | 2.91 $\pm$ 0.78  |
| Vaccarino (2011)                 | CFR (-)         | N-13, adenosine                               | N/A               | N/A              | 268               | 2.68 $\pm$ 0.83  |
| Vermeltfoort (2011)              | CFR (+)         | 15-O labeled water, adenosine                 | N/A               | N/A              | 27                | 3.28 $\pm$ 0.83  |
| Uusitalo (2013)                  | CFR (+)         | 15-O labeled water, adenosine or dipyridamole | N/A               | N/A              | 77                | 4.10 $\pm$ 1.30  |
| <i>Mean <math>\pm</math> SEM</i> |                 |                                               |                   |                  |                   |                  |
| Buus (1999)                      | CFR (-)         | N-13, dipyridamole                            | 16                | 2.06 $\pm$ 0.14  | 15                | 2.93 $\pm$ 0.17  |
| <i>Median (IQR)</i>              |                 |                                               |                   |                  |                   |                  |

|                                                                                                                                                                                                                                 |         |                     |    |                      |     |     |
|---------------------------------------------------------------------------------------------------------------------------------------------------------------------------------------------------------------------------------|---------|---------------------|----|----------------------|-----|-----|
| Michelsen<br>(2017)                                                                                                                                                                                                             | MFR (+) | Rb-82,<br>adenosine | 95 | 2.13 (1.80-<br>2.40) | N/A | N/A |
| <b>Abbreviations:</b> CFR = coronary flow reserve, IQR = interquartile range, MPR = myocardial perfusion reserve, MFR: myocardial flow reserve, N/A = not available, SD = standard deviation, SEM = standard error of the mean. |         |                     |    |                      |     |     |
