# Supplementary material for: Evaluation of non-invasive imaging parameters in coronary microvascular disease: a systematic review
Source: PubMed Central journal article supplement (PMC7789672; doi:10.1186/s12880-020-00535-7), 2021-01-06
Supplement: 12880_2020_535_MOESM5_ESM.pdf [file 12880_2020_535_MOESM5_ESM.pdf]

**Additional file 5: Table S4 Quantification of coronary microvascular dysfunction in TTE studies.**

| Study                                  | Outcome measure | TTE imaging protocol                        | Patient group n = | Mean ( $\pm$ SD) | Control group n = | Mean ( $\pm$ SD) |
|----------------------------------------|-----------------|---------------------------------------------|-------------------|------------------|-------------------|------------------|
| <b><i>Mean <math>\pm</math> SD</i></b> |                 |                                             |                   |                  |                   |                  |
| Galiuto (2007)                         | CFR             | PW Doppler, distal LAD, adenosine           | 17                | 1.98 $\pm$ 0.60  | 17                | 2.88 $\pm$ 1.50  |
| Cemin (2008)                           | CFR             | PW Doppler, distal LAD, adenosine           | N/A               | N/A              | 14                | 2.65 $\pm$ 0.65  |
| Lanza (2008)                           | CFR             | Doppler ST, mid-distal LAD, adenosine       | 18                | 2.03 $\pm$ 0.60  | 10                | 3.29 $\pm$ 1.00  |
| Di Monaco (2009)                       | CFR             | Doppler ST mid-distal LAD, adenosine        | 29                | 1.94 $\pm$ 0.63  | 12                | 3.31 $\pm$ 1.10  |
| Sestito (2011)                         | CBF             | Doppler ST, mid-distal LAD, adenosine       | 71                | 2.05 $\pm$ 0.60  | 20                | 2.92 $\pm$ 0.90  |
| Di Franco (2012)                       | CBF             | Doppler ST, mid-distal LAD, adenosine       | 14                | 1.90 $\pm$ 0.50  | 14                | 3.10 $\pm$ 0.90  |
| Tagliamonte (2015)                     | CFR             | Doppler ST, mid-distal LAD, dipyridamole    | 29 (ranolazine)   | 1.91 $\pm$ 0.31  | N/A               | N/A              |
|                                        |                 |                                             | 29 (placebo)      | 1.94 $\pm$ 0.29  |                   |                  |
| Wu (2015)                              | CBFV            | PW Doppler, mid-distal LAD, nitroglycerin   | 13 (placebo)      | 1.69 $\pm$ 0.40  | N/A               | N/A              |
|                                        |                 |                                             | 11 (ISMN)         | 1.71 $\pm$ 0.40  |                   |                  |
| Anchisi (2017)                         | CFR             | Color Doppler, mid-distal LAD, dipyridamole | 16                | 2.40 $\pm$ 0.40  | N/A               | N/A              |
| <b><i>Median (IQR)</i></b>             |                 |                                             |                   |                  |                   |                  |
| Mygind (2016)                          | CFVR            | PW Doppler,                                 | 963               | 2.33 (1.98–2.76) | N/A               | N/A              |

|                     |      |                                                   |     |                      |     |     |
|---------------------|------|---------------------------------------------------|-----|----------------------|-----|-----|
|                     |      | LAD,<br>dipyridamol<br>e or MCE                   |     |                      |     |     |
| Michelsen<br>(2017) | CFVR | PW<br>Doppler,<br>LAD,<br>dipyridamol<br>e or MCE | 102 | 1.99 (1.64–<br>2.43) | N/A | N/A |

**Abbreviations:** CFR = coronary flow reserve, CBF = coronary blood flow, CBFV = coronary blood flow velocity, CFVR = coronary flow velocity reserve, PW = pulsed-waved, ST = spectral tracing, MCE = myocardial contrast echocardiography, LAD = left anterior descending artery, IQR = interquartile range, N/A = not available, SD = standard deviation.
