# Supplementary material for: Evaluation of non-invasive imaging parameters in coronary microvascular disease: a systematic review
Source: PubMed Central journal article supplement (PMC7789672; doi:10.1186/s12880-020-00535-7), 2021-01-06
Supplement: 12880_2020_535_MOESM6_ESM.pdf [file 12880_2020_535_MOESM6_ESM.pdf]

**Additional file 6: Table S5 Definition of nonobstructive CAD in included studies.**

| <b>Author (year)</b> | <b>Definition nonobstructive CAD</b>                                                                                                                                                          |
|----------------------|-----------------------------------------------------------------------------------------------------------------------------------------------------------------------------------------------|
| Meeder (1997)        | Completely normal coronary arteries without any vessel irregularities on CAG.                                                                                                                 |
| Bottcher (1999)      | Completely normal coronary arteriography.                                                                                                                                                     |
| Buus (1999)          | Normal CAG with smooth coronary arteries.                                                                                                                                                     |
| Panting (2002)       | Completely normal results on coronary angiography, with no inducible spasm on ergonovine-provocation testing.                                                                                 |
| Marroquin (2003)     | Normal or minimal luminal irregularities on CAG (<50% stenosis)                                                                                                                               |
| De Vries (2006)      | Normal coronary findings on angiography.                                                                                                                                                      |
| Graf (2006)          | Normal angiogram.                                                                                                                                                                             |
| Pärkkä (2006)        | N/A                                                                                                                                                                                           |
| Wöhrlé (2006)        | Smooth vessel contours without lumen irregularities on CAG.                                                                                                                                   |
| Galiuto (2007)       | Angiographically normal coronary arteries.                                                                                                                                                    |
| Graf (2007)          | Normal coronary angiogram.                                                                                                                                                                    |
| Vermeltfoort (2007)  | Completely normal results from coronary angiography.                                                                                                                                          |
| Cemin (2008)         | N/A                                                                                                                                                                                           |
| Lanza (2008)         | Angiographically normal epicardial coronary arteries.                                                                                                                                         |
| Di Monaco (2009)     | Totally normal coronary arteries at angiography.                                                                                                                                              |
| Mehta (2011)         | <50% epicardial coronary stenosis in all epicardial coronary arteries on CAG.                                                                                                                 |
| Scholtens (2011)     | Normal coronary angiogram.                                                                                                                                                                    |
| Sestito (2011)       | Smooth coronary arteries at angiography. Coronary artery spasm had been excluded according to intracoronary or systemic ergonovine test in patients who reported angina episodes also at rest |
| Vaccarino (2011)     | N/A                                                                                                                                                                                           |
| Vermeltfoort (2011)  | N/A                                                                                                                                                                                           |
| Di Franco (2012)     | Angiographically normal coronary arteries.                                                                                                                                                    |
| Karamitsos (2012)    | Angiographically smooth normal epicardial coronary arteries on CAG.                                                                                                                           |
| Uusitalo (2013)      | N/A                                                                                                                                                                                           |
| Nelson (2014)        | N/A                                                                                                                                                                                           |
| Thomson (2015)       | Exclusion: >50% luminal diameter stenosis in 1 epicardial coronary artery.                                                                                                                    |
| Tagliamonte (2015)   | <70% coronary stenosis in all epicardial coronary arteries on CAG.                                                                                                                            |
| Wu (2015)            | Normal coronary angiography.                                                                                                                                                                  |
| Bairey Merz (2016)   | <50% epicardial coronary stenosis in all epicardial coronary arteries.                                                                                                                        |
| Bakir (2016)         | N/A                                                                                                                                                                                           |
| Mygind (2016)        | <50 % stenosis of epicardial vessels assessed by diagnostic invasive CAG.                                                                                                                     |
| Anchisi (2017)       | Normal coronary angiography.                                                                                                                                                                  |
| Jaarsma (2017)       | Normal coronary arteries or minimal vessel wall irregularities (<25% stenosis) on CAG.                                                                                                        |
| Michelsen (2017)     | <50% stenosis on CAG.                                                                                                                                                                         |

|                 |                                                                                                              |
|-----------------|--------------------------------------------------------------------------------------------------------------|
| Liu (2018) (19) | Angiographic NOCAD (<50% visual stenosis) on CAG.                                                            |
| Liu (2018) (27) | FFR $\geq$ 0.8 and IMR $\geq$ 25 U measured with invasive CAG.                                               |
| Zorach (2018)   | Exclusion: >50% stenosis in at least one coronary artery or FFR <0.8 in at least one coronary artery on CAG. |
| Rahman (2019)   | CAG result of <30% diameter stenosis and/or fractional flow reserve >0.80 and invasive CFR < 2.5             |
